# Supplementary material
Source: PubMed Central journal article supplement (PMC7815162)
Supplement: NIHMS1655984-supplement-Supplemental_table_S1.pdf [file NIHMS1655984-supplement-Supplemental_table_S1.pdf]

**TABLE S1: Demographic Characteristics of the Patient Population**

| Parameter            | Group 1    | Group 2    |
|----------------------|------------|------------|
| Age (y)              | 62.0 ± 0.9 | 62.1 ± 0.9 |
| Prostate volume (mL) | 66.2 ± 6.0 | 57.0 ± 3.9 |
| PSA level (ng/mL)    | 10.1 ± 2.1 | 7.0 ± 0.6  |

Note—Data are mean ( $\pm$  SD) values. Group 1 included 42 men who abstained from ejaculation for less than 3 days before undergoing prostate MRI, and group 2 included 42 age-matched randomly selected men who abstained from ejaculation for 3 days or more. PSA = prostate-specific antigen.
