# Supplementary material
Source: PubMed Central journal article supplement (PMC7815162)
Supplement: NIHMS1655984-supplement-Supplemental_table_S2.pdf [file NIHMS1655984-supplement-Supplemental_table_S2.pdf]

**TABLE S2: Pulse Sequences and Parameters Used for T2-Weighted MRI of Seminal Vesicle Evaluation**

| Imaging Plane | FOV (mm) | Resolution (mm) | Section Thickness (mm) | No. of Sections | TR/TE    | Echo-Train Length | Flip Angle (°) | Duration   |
|---------------|----------|-----------------|------------------------|-----------------|----------|-------------------|----------------|------------|
| Axial         | 140      | 0.3             | 3                      | 26              | 4400/120 | 26                | 90             | 2 min 48 s |
| Sagittal      | 140      | 0.3             | 3                      | 24              | 2900/120 | 26                | 90             | 1 min 50 s |
| Coronal       | 140      | 0.3             | 3                      | 20              | 2400/120 | 26                | 90             | 2 min 20 s |
