# Supplementary material
Source: PubMed Central journal article supplement (PMC7815162)
Supplement: NIHMS1655984-supplement-Supplemental_table_S3.pdf [file NIHMS1655984-supplement-Supplemental_table_S3.pdf]

**TABLE S3: Seminal Vesicle (SV) Volumes in Groups 1 and 2**

| Group | Right SV (mL) | Left SV (mL) | Total SV (mL) |
|-------|---------------|--------------|---------------|
| 1     | 3.1 ± 0.4     | 2.9 ± 0.3    | 6.0 ± 0.6     |
| 2     | 4.7 ± 0.5     | 4.1 ± 0.4    | 8.8 ± 0.8     |

Note—Data are mean (± SE) values. Group 1 included 42 men who abstained from ejaculation for less than 3 days before undergoing prostate MRI, and group 2 included 42 age-matched randomly selected men who abstained from ejaculation for 3 days or more.
